# Supplementary material
Source: PubMed Central journal article supplement (PMC3376542)
Supplement: NIHMS358899-supplement-supplement_1.pdf [file NIHMS358899-supplement-supplement_1.pdf]

leads to the release of Mss51 from the assembly intermediates, which allows further rounds of Cox1 synthesis. The mitochondrial Hsp70 Ssc1, which has been suggested to associate with Mss51 in the 'TE' and in the 'SI' states is not shown.

**Figure S1| Crystal structure of monomeric bovine cytochrome oxidase.**

Shown are schematic presentations of bovine subunits<sup>12</sup>, that are homologous to the yeast proteins: Cox1 (yellow), Cox2 (blue), Cox3 (dark green), Cox4 (purple), Cox5 (light green), Cox6 (brown), Cox7 (grey), Cox8 (orange), Cox9 (magenta), Cox12 (salmon), Cox13 (cyan); and cofactors: heme moieties (red stick models) and copper ions (green spheres). (A) Side-view of all subunits with the matrix at the bottom and the IMS side at the top. (B) Top-view of a section through the transmembrane domains from the IMS-side. Helices of subunits containing more than a single transmembrane helix are indicated in Roman numbering. PDB entry: 1OCC, analyzed with PyMol software, Version 1.2r3pre, LLC.

**Supplementary Table:**

Assembly factors for cytochrome oxidase in yeast and human

Links to web sites: none

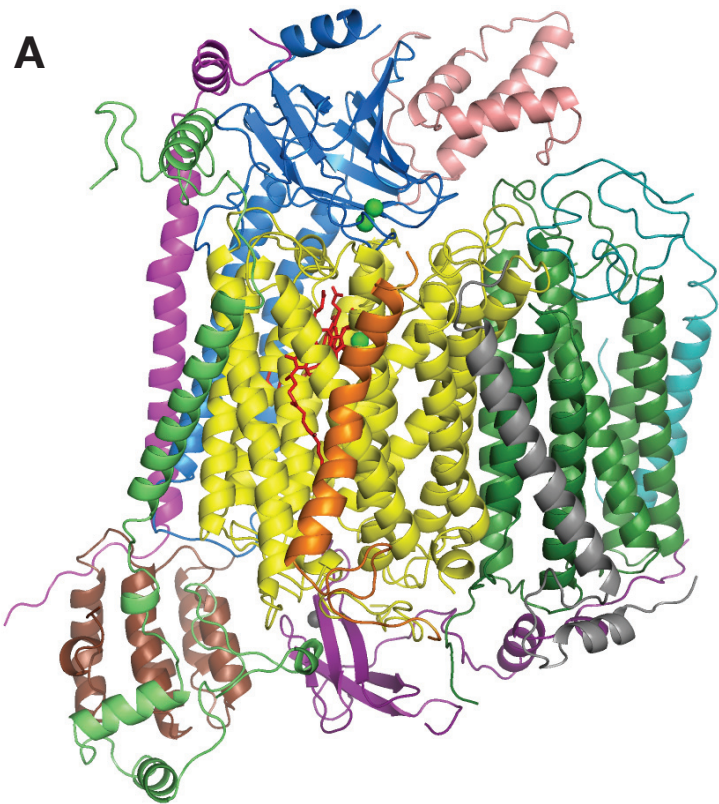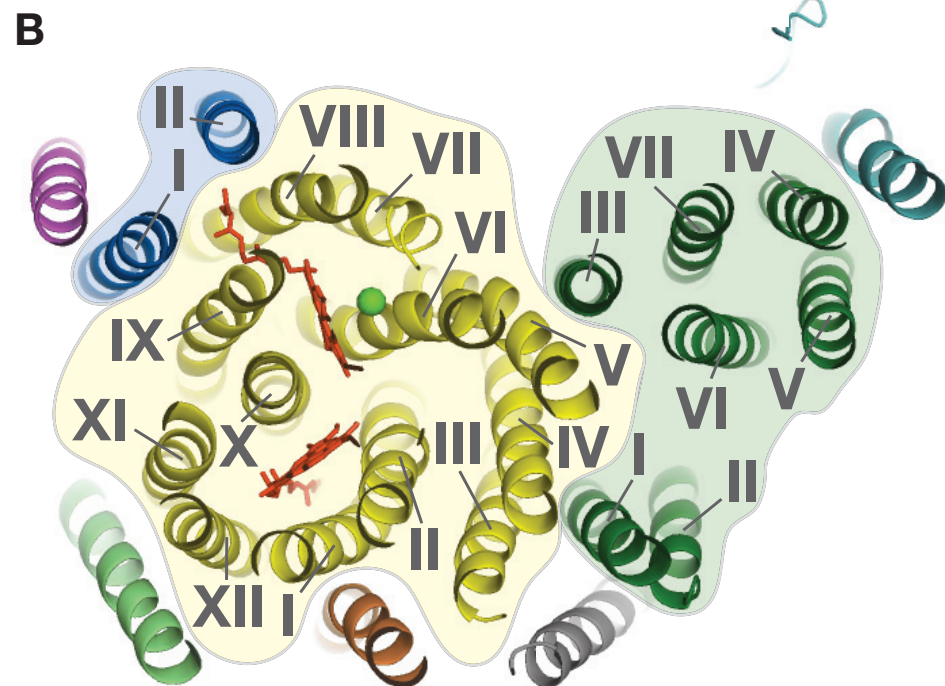

**C**

**Nomenclature of cytochrome oxidase subunits**

| Yeast                                          | Mammals       | Functions*                                                             |
|------------------------------------------------|---------------|------------------------------------------------------------------------|
| Mitochondria-encoded subunits (catalytic core) |               |                                                                        |
| Cox1                                           | COX1 or MTCO1 | Coordination of hemes and Cu <sub>B</sub> center; proton translocation |
| Cox2                                           | COX2 or MTCO2 | Coordination of Cu <sub>A</sub> site                                   |
| Cox3                                           | COX3 or MTCO3 | Stabilizing enzymatic core                                             |
| Nuclear-encoded structural subunits            |               |                                                                        |
| Cox4                                           | COX5b         | Coordination of zinc ion                                               |
| Cox5a and b                                    | COX4-1 and -2 | Stabilizing newly synthesized Cox1; regulating activity                |
| Cox6                                           | COX5a         | Stabilizing Cox5a and b (COX4-1 and -2 respectively)                   |
| Cox7                                           | COX7a         | Unknown                                                                |
| Cox8                                           | COX7c         | Unknown                                                                |
| Cox9                                           | COX6c         | Unknown                                                                |
| Cox12                                          | COX6b         | Unknown                                                                |
| Cox13                                          | COX6a         | Influencing activity; ATP sensing                                      |
| n/i                                            | COX7b         | Unknown                                                                |
| n/i                                            | COX8          | Unknown                                                                |

n/i, no homolog identified; \*, based on published data

**Supplementary Table I. Cytochrome oxidase assembly factors**

| Yeast                                         | Mammals       | Functions*                                                 |
|-----------------------------------------------|---------------|------------------------------------------------------------|
| Translational regulation                      |               |                                                            |
| Mss51                                         | n/i           | Cox1 translation and stabilization (see below)             |
| Pet309                                        | (LRPPRC)      | Cox1 translation (Stabilization of COX1 and COX3 mRNAs)    |
| Pet111                                        | n/i           | Cox2 translation                                           |
| Pet54                                         | n/i           | Cox3 translation                                           |
| Pet122                                        | n/i           | Cox3 translation                                           |
| Pet494                                        | n/i           | Cox3 translation                                           |
| Hah1                                          | TACO1         | COX1 translation in humans, no respiratory defect in yeast |
| Membrane insertion and processing             |               |                                                            |
| Oxa1                                          | OXA1          | Main insertase for catalytic core; assembly facilitator    |
| Cox18/Oxa2                                    | COX18         | Export of C-terminal domain of Cox2                        |
| Mss2                                          | n/i           | Recognition of Cox2 C-terminal domain                      |
| Pnt1                                          | n/i           | Recognition of Cox2 C-terminal domain                      |
| Imp1                                          | n/i           | Maturation of Cox2 precursor                               |
| Heme a synthesis                              |               |                                                            |
| Cox10                                         | COX10         | Heme o synthesis; formation of heme a site in Cox1         |
| Cox15                                         | COX15         | Heme a synthesis                                           |
| Yah1                                          | FDX1          | Heme a synthesis; (iron-sulfur-cluster biogenesis)         |
| Copper transport and insertion                |               |                                                            |
| Sco1                                          | SCO1 and SCO2 | Formation of Cu <sub>A</sub> center (Cox2)                 |
| Sco2                                          | n/i           | Unknown                                                    |
| Cox11                                         | COX11         | Formation of Cu <sub>B</sub> center (Cox1)                 |
| Cox17                                         | COX17         | Copper delivery to Cox11 and Sco1                          |
| Cox19                                         | COX19         | Copper trafficking                                         |
| Cox23                                         | n/i           | Copper trafficking                                         |
| Assembly factors with chaperone-like function |               |                                                            |
| Cox14                                         | n/i           | Negative regulator of Cox1 translation                     |
| Cox20                                         | n/i           | Cox2-specific chaperone                                    |
| Shy1                                          | SURF1         | Involved in Cox1 biogenesis; heme a <sub>3</sub> insertion |
| Mss51                                         | n/i           | Specific Cox1 chaperone                                    |
| Coa1                                          | n/i           | Transition from Cox1 translation to co-factor insertion    |
| Coa2                                          | n/i           | Cox1 stabilization; cooperation with Cox10                 |
| Coa3                                          | n/i           | Negative regulator of Cox1 translation                     |
| Coa4                                          | n/i           | Membrane stabilization of Cytochrome c                     |
| Pet100                                        | n/i           | Assembly facilitator for Cox7-Cox8-Cox9 subcomplex         |
| Pet117                                        | n/i           | Unknown                                                    |
| Pet191                                        | PET191        | Unknown                                                    |

n/i, no homolog identified; \*, based on published data
